# Supplementary material
Source: Springer Nature journal article supplement (https://www.springermedizin.de/resource/supplementary/12913_2011_1852_MOESM1_ESM.pdf/9529136)
Supplement: MOESM1 [file 9529136]

Outpatient registration process

Method 1: Web-based appointment system (WAS)

Step 1: login to the WAS

Step 2: get an appointment

Step 3: arrive at the hospital

Method 2: Traditional queuing

Step 1: arrive at the hospital

Step 2: queue at registration window

Get a registration
